# Supplementary material for: Assessment of depressive symptoms in patients with COVID-19 during the second wave of epidemic in Myanmar: A cross-sectional single-center study
Source: PubMed Central journal article supplement (PMC8177551; doi:10.1371/journal.pone.0252189), 2021-06-04
Supplement: pone.0252189.s001.pdf [file pone.0252189.s001.pdf]

## QUESTIONNAIRES (English)

Code

| Socioeconomic factors                                   |                                                                                                                                                   |
|---------------------------------------------------------|---------------------------------------------------------------------------------------------------------------------------------------------------|
| Age <span style="float: right;">years</span>            | Sex <span style="margin-left: 20px;"><input type="checkbox"/> Male</span> <span style="margin-left: 20px;"><input type="checkbox"/> female</span> |
| Township                                                |                                                                                                                                                   |
| Education                                               |                                                                                                                                                   |
| <input type="checkbox"/> Illiterate                     | <input type="checkbox"/> Middle school education level                                                                                            |
| <input type="checkbox"/> Read and write                 | <input type="checkbox"/> High school education level                                                                                              |
| <input type="checkbox"/> Primary school education level | <input type="checkbox"/> Graduate and above                                                                                                       |
| Occupation                                              |                                                                                                                                                   |
| <input type="checkbox"/> Dependent                      |                                                                                                                                                   |
| <input type="checkbox"/> Unskilled laborer              |                                                                                                                                                   |
| <input type="checkbox"/> Own business                   |                                                                                                                                                   |
| <input type="checkbox"/> Private employee               |                                                                                                                                                   |
| <input type="checkbox"/> Government staff               |                                                                                                                                                   |
| Marital status                                          |                                                                                                                                                   |
| <input type="checkbox"/> Single                         |                                                                                                                                                   |
| <input type="checkbox"/> Married                        |                                                                                                                                                   |
| <input type="checkbox"/> Separate                       |                                                                                                                                                   |
| <input type="checkbox"/> Divorced                       |                                                                                                                                                   |
| <input type="checkbox"/> Widowed                        |                                                                                                                                                   |
| Living situation                                        |                                                                                                                                                   |
| <input type="checkbox"/> Alone                          |                                                                                                                                                   |
| <input type="checkbox"/> With family                    |                                                                                                                                                   |
| <input type="checkbox"/> With friends                   |                                                                                                                                                   |
| <input type="checkbox"/> Others, please specify .....   |                                                                                                                                                   |
| Household size                                          | Monthly family income <span style="float: right;">kyats</span>                                                                                    |
| Smoking status                                          | <input type="checkbox"/> Yes <span style="margin-left: 100px;"><input type="checkbox"/> No</span>                                                 |
| Alcohol drinking                                        | <input type="checkbox"/> Yes <span style="margin-left: 100px;"><input type="checkbox"/> No</span>                                                 |
| Comorbidity                                             | <input type="checkbox"/> Yes <span style="margin-left: 100px;"><input type="checkbox"/> No</span>                                                 |

| <b>Epidemic-related factors</b>                          |                              |                             |
|----------------------------------------------------------|------------------------------|-----------------------------|
| Contact history                                          | <input type="checkbox"/> Yes | <input type="checkbox"/> No |
| Infected to family members                               | <input type="checkbox"/> Yes | <input type="checkbox"/> No |
| Travelling history to abroad                             | <input type="checkbox"/> Yes | <input type="checkbox"/> No |
| Travelling history to townships under stay at home order | <input type="checkbox"/> Yes | <input type="checkbox"/> No |
| Presenting symptom                                       | <input type="checkbox"/> Yes | <input type="checkbox"/> No |
| <b>Psychological factors</b>                             |                              |                             |
| Psychological history                                    | <input type="checkbox"/> Yes | <input type="checkbox"/> No |
| Psychological history in family members                  | <input type="checkbox"/> Yes | <input type="checkbox"/> No |
| <b>Psychosocial supports</b>                             |                              |                             |
| Social support                                           | <input type="checkbox"/> Yes | <input type="checkbox"/> No |
| Mental support                                           | <input type="checkbox"/> Yes | <input type="checkbox"/> No |

## Depressive symptoms in patients with COVID-19

Below is a list of the ways you might have felt or behaved. Please tell me how often you have felt this way during the past week.

| Statements                                                                                 | During the past week                            |                                            |                                                         |                                       |
|--------------------------------------------------------------------------------------------|-------------------------------------------------|--------------------------------------------|---------------------------------------------------------|---------------------------------------|
|                                                                                            | Rarely or none of the time<br>(less than 1 day) | Some or a little of the time<br>(1-2 days) | Occasionally or a moderate<br>amount of time (3-4 days) | Most or all of the time (5-7<br>days) |
| 1 I was bothered by things that usually don't bother me.                                   | <input type="checkbox"/>                        | <input type="checkbox"/>                   | <input type="checkbox"/>                                | <input type="checkbox"/>              |
| 2 I did not feel like eating; m appetite was poor.                                         | <input type="checkbox"/>                        | <input type="checkbox"/>                   | <input type="checkbox"/>                                | <input type="checkbox"/>              |
| 3 I felt that I could not shake off the blues even with<br>help from my family or friends. | <input type="checkbox"/>                        | <input type="checkbox"/>                   | <input type="checkbox"/>                                | <input type="checkbox"/>              |
| 4 I felt I was just as good as other people.                                               | <input type="checkbox"/>                        | <input type="checkbox"/>                   | <input type="checkbox"/>                                | <input type="checkbox"/>              |
| 5 I had trouble keeping my mind on what I am doing.                                        | <input type="checkbox"/>                        | <input type="checkbox"/>                   | <input type="checkbox"/>                                | <input type="checkbox"/>              |
| 6 I felt depressed.                                                                        | <input type="checkbox"/>                        | <input type="checkbox"/>                   | <input type="checkbox"/>                                | <input type="checkbox"/>              |
| 7 I felt that everything I did was an effort.                                              | <input type="checkbox"/>                        | <input type="checkbox"/>                   | <input type="checkbox"/>                                | <input type="checkbox"/>              |
| 8 I felt hopeful about the future.                                                         | <input type="checkbox"/>                        | <input type="checkbox"/>                   | <input type="checkbox"/>                                | <input type="checkbox"/>              |
| 9 I thought my life had been a failure.                                                    | <input type="checkbox"/>                        | <input type="checkbox"/>                   | <input type="checkbox"/>                                | <input type="checkbox"/>              |
| 10 I felt fearful.                                                                         | <input type="checkbox"/>                        | <input type="checkbox"/>                   | <input type="checkbox"/>                                | <input type="checkbox"/>              |
| 11 My sleep was restless.                                                                  | <input type="checkbox"/>                        | <input type="checkbox"/>                   | <input type="checkbox"/>                                | <input type="checkbox"/>              |
| 12 I was happy.                                                                            | <input type="checkbox"/>                        | <input type="checkbox"/>                   | <input type="checkbox"/>                                | <input type="checkbox"/>              |

- |    |                           |                          |                          |                          |                          |
|----|---------------------------|--------------------------|--------------------------|--------------------------|--------------------------|
| 13 | I talked less than usual. | <input type="checkbox"/> | <input type="checkbox"/> | <input type="checkbox"/> | <input type="checkbox"/> |
| 14 | I felt lonely.            | <input type="checkbox"/> | <input type="checkbox"/> | <input type="checkbox"/> | <input type="checkbox"/> |
| 15 | People were unfriendly.   | <input type="checkbox"/> | <input type="checkbox"/> | <input type="checkbox"/> | <input type="checkbox"/> |
| 16 | I enjoyed life.           | <input type="checkbox"/> | <input type="checkbox"/> | <input type="checkbox"/> | <input type="checkbox"/> |
| 17 | I had crying spells.      | <input type="checkbox"/> | <input type="checkbox"/> | <input type="checkbox"/> | <input type="checkbox"/> |
| 18 | I felt sad.               | <input type="checkbox"/> | <input type="checkbox"/> | <input type="checkbox"/> | <input type="checkbox"/> |
| 19 | I felt people dislike me. | <input type="checkbox"/> | <input type="checkbox"/> | <input type="checkbox"/> | <input type="checkbox"/> |
| 20 | I could not get “going”.  | <input type="checkbox"/> | <input type="checkbox"/> | <input type="checkbox"/> | <input type="checkbox"/> |
