# Supplementary material for: Assessment of depressive symptoms in patients with COVID-19 during the second wave of epidemic in Myanmar: A cross-sectional single-center study
Source: PubMed Central journal article supplement (PMC8177551; doi:10.1371/journal.pone.0252189), 2021-06-04
Supplement: pone.0252189.s002.pdf [file pone.0252189.s002.pdf]

## QUESTIONNAIRES (Myanmar)

ကုဒ်နံပါတ်

| လူမှုစီးပွားရေးဆိုင်ရာအချက်အလက်များ                     |                                          |                                                          |
|---------------------------------------------------------|------------------------------------------|----------------------------------------------------------|
| အသက် (ပြည့်ပြီး)                                        | နှစ်                                     | <input type="checkbox"/> ကျား <input type="checkbox"/> မ |
| မြို့နယ်                                                |                                          |                                                          |
| ပညာအရည်အချင်း                                           |                                          |                                                          |
| <input type="checkbox"/> စာမတတ်                         | <input type="checkbox"/> အလယ်တန်းပညာ     |                                                          |
| <input type="checkbox"/> ရေး/ဖတ်                        | <input type="checkbox"/> အထက်တန်းပညာ     |                                                          |
| <input type="checkbox"/> မူလတန်းပညာ                     | <input type="checkbox"/> ဘွဲ့ရနှင့် အထက် |                                                          |
| အလုပ်အကိုင်                                             |                                          |                                                          |
| <input type="checkbox"/> မှီခို                         |                                          |                                                          |
| <input type="checkbox"/> ကျပန်း/နေ့စား                  |                                          |                                                          |
| <input type="checkbox"/> ကိုယ်ပိုင်                     |                                          |                                                          |
| <input type="checkbox"/> လခစား/ကုမ္ပဏီဝန်ထမ်း           |                                          |                                                          |
| <input type="checkbox"/> အစိုးရဝန်ထမ်း                  |                                          |                                                          |
| အိမ်ထောင်ရေးအခြေအနေ                                     |                                          |                                                          |
| <input type="checkbox"/> လူပျို/အပျို                   |                                          |                                                          |
| <input type="checkbox"/> အိမ်ထောင်သည်အတူနေ              |                                          |                                                          |
| <input type="checkbox"/> အိမ်ထောင်သည်အတူမနေ             |                                          |                                                          |
| <input type="checkbox"/> အိမ်ထောင်ကွဲ                   |                                          |                                                          |
| <input type="checkbox"/> မုဆိုးမ/ဖို                    |                                          |                                                          |
| နေထိုင်မှုအခြေအနေ                                       |                                          |                                                          |
| <input type="checkbox"/> တစ်ကိုယ်တည်း                   |                                          |                                                          |
| <input type="checkbox"/> မိသားစုနှင့်အတူ                |                                          |                                                          |
| <input type="checkbox"/> သူငယ်ချင်း/မိတ်ဆွေများနှင့်အတူ |                                          |                                                          |
| <input type="checkbox"/> အခြား: .....                   |                                          |                                                          |
| အတူနေလူဦးရေ                                             | မိသားစုတစ်လဝင်ငွေ                        | ကျပ်                                                     |
| ဆေးလိပ်သောက်သုံးမှု                                     | <input type="checkbox"/> သောက်ပါသည်      | <input type="checkbox"/> မသောက်ပါ                        |
| အရက်သောက်သုံးမှု                                        | <input type="checkbox"/> သောက်ပါသည်      | <input type="checkbox"/> မသောက်ပါ                        |
| ရောဂါအခံ                                                | <input type="checkbox"/> ရှိပါသည်        | <input type="checkbox"/> မရှိပါ                          |

| <b>COVID-19 ကူးစက်ရောဂါနှင့်ပတ်သတ်သောအချက်အလက်များ</b>                                         |                                   |                                 |
|------------------------------------------------------------------------------------------------|-----------------------------------|---------------------------------|
| COVID-19 ရောဂါရှိသူနှင့် ထိတွေ့မှု                                                             | <input type="checkbox"/> ရှိပါသည် | <input type="checkbox"/> မရှိပါ |
| မိသားစုဝင်များအား ကူးစက်ခံရမှု                                                                 | <input type="checkbox"/> ရှိပါသည် | <input type="checkbox"/> မရှိပါ |
| နိုင်ငံခြားသို့ လွန်ခဲ့သော ၁၄ ရက်အတွင်း သွားရောက်ခဲ့ခြင်း                                      | <input type="checkbox"/> ရှိပါသည် | <input type="checkbox"/> မရှိပါ |
| Stay at home order တွင်အကျုံးဝင်သော မြို့နယ်များသို့ လွန်ခဲ့သော ၁၄ ရက်အတွင်း သွားရောက်ခဲ့ခြင်း | <input type="checkbox"/> ရှိပါသည် | <input type="checkbox"/> မရှိပါ |
| ရောဂါလက္ခဏာများ                                                                                | <input type="checkbox"/> ရှိပါသည် | <input type="checkbox"/> မရှိပါ |
| <b>စိတ်ရောဂါနှင့်ပတ်သတ်သောအချက်အလက်များ</b>                                                    |                                   |                                 |
| ကိုယ်တိုင် စိတ်ရောဂါခံစားနေခြင်း                                                               | <input type="checkbox"/> ရှိပါသည် | <input type="checkbox"/> မရှိပါ |
| မိသားစုဝင်များတွင် စိတ်ရောဂါခံစားနေခြင်း                                                       | <input type="checkbox"/> ရှိပါသည် | <input type="checkbox"/> မရှိပါ |
| <b>စိတ်ပိုင်းဆိုင်ရာ လူမှုရေးဆိုင်ရာထောက်ပံ့ပေးမှုအချက်အလက်များ</b>                            |                                   |                                 |
| လူမှုရေးဆိုင်ရာထောက်ပံ့မှုရရှိခြင်း                                                            | <input type="checkbox"/> ရှိပါသည် | <input type="checkbox"/> မရှိပါ |
| စိတ်ပိုင်းဆိုင်ရာထောက်ပံ့မှုရရှိခြင်း                                                          | <input type="checkbox"/> ရှိပါသည် | <input type="checkbox"/> မရှိပါ |

**စိတ်ကျဆင်းမှုလက္ခဏာများအား ဆန်းစစ်ခြင်း**

အောက်ပါအချက်များသည် သင်စိတ်ခံစားမှုများအား ကိုယ်စားပြုဖော်ပြပေးသည်။ ကျေးဇူးပြု၍ လွန်ခဲ့သောတစ်ပတ် အတွင်း အကြိမ်မည်မျှခံစားခဲ့ရသည်ကို ဖော်ပြပေးပါ။

|   | အကြောင်းအရာ                                                                                                                        | လွန်ခဲ့သော တစ်ပတ်အချိန်အတိုင်းအတာတွင်                            |                                        |                                                     |                                                          |
|---|------------------------------------------------------------------------------------------------------------------------------------|------------------------------------------------------------------|----------------------------------------|-----------------------------------------------------|----------------------------------------------------------|
|   |                                                                                                                                    | ဖြစ်တောင့်ဖြစ်ခဲ (သို့) လုံးဝမဖြစ်ခဲ့ (သို့) တစ်ရက်ထက်ပိုနည်းခဲ့ | အချိန်အနည်းငယ်သာဖြစ်ခဲ့ (သို့) ၁-၂ ရက် | ရံဖန်ရံခါ (သို့) အချိန်အတော်များများ (သို့) ၃-၄ ရက် | များသောအားဖြင့် (သို့) အချိန်တိုင်းနီးပါး (သို့) ၅-၇ ရက် |
| ၁ | ပုံမှန်အားဖြင့် ကျွန်ုပ်ကို စိတ်အနှောက်အယှက် မဖြစ်စေသော အရာများက စိတ်အနှောက်အယှက်ဖြစ်စေခဲ့သည်။                                     | <input type="checkbox"/>                                         | <input type="checkbox"/>               | <input type="checkbox"/>                            | <input type="checkbox"/>                                 |
| ၂ | စားသောက်လိုစိတ်မရှိခဲ့ပါ။ အစားအသောက်ခံတွင်း ပျက်နေခဲ့သည်။                                                                          | <input type="checkbox"/>                                         | <input type="checkbox"/>               | <input type="checkbox"/>                            | <input type="checkbox"/>                                 |
| ၃ | ကျွန်ုပ်၏ မိသားစု (သို့) သူငယ်ချင်းမိတ်ဆွေများ၏ ကူညီပေးမှု ရှိသော်လည်း စိတ်နှမ်းလျှ အားငယ်နေခြင်းကို မဖယ်ထုတ်နိုင်ဟု ခံစားခဲ့ရသည်။ | <input type="checkbox"/>                                         | <input type="checkbox"/>               | <input type="checkbox"/>                            | <input type="checkbox"/>                                 |
| ၄ | ကျွန်ုပ်သည် အခြားသူများနည်းတူ အဆင်ပြေနေသည်ဟု ခံစားမိခဲ့သည်။                                                                        | <input type="checkbox"/>                                         | <input type="checkbox"/>               | <input type="checkbox"/>                            | <input type="checkbox"/>                                 |
| ၅ | ကျွန်ုပ် ဆောင်ရွက်လုပ်ကိုင်နေသော အရာများအပေါ် စိတ်အာရုံမပြတ်ထားရှိရန် ခက်ခဲခဲ့သည်။                                                 | <input type="checkbox"/>                                         | <input type="checkbox"/>               | <input type="checkbox"/>                            | <input type="checkbox"/>                                 |
| ၆ | ကျွန်ုပ် စိတ်ဓါတ်ကျနေခဲ့သည်။                                                                                                       | <input type="checkbox"/>                                         | <input type="checkbox"/>               | <input type="checkbox"/>                            | <input type="checkbox"/>                                 |
| ၇ | ကျွန်ုပ် ဆောင်ရွက်လုပ်ကိုင်ခဲ့သော အရာတိုင်းတွင် ကြိုးစားအားထုတ်မှုရှိခဲ့ရသည်။                                                      | <input type="checkbox"/>                                         | <input type="checkbox"/>               | <input type="checkbox"/>                            | <input type="checkbox"/>                                 |
| ၈ | အနာဂတ်နှင့်ပတ်သတ်၍ မျှော်လင့်ချက်ရှိသည်ဟု ကျွန်ုပ် ခံစားခဲ့ရသည်။                                                                   | <input type="checkbox"/>                                         | <input type="checkbox"/>               | <input type="checkbox"/>                            | <input type="checkbox"/>                                 |

|    |                                                           |                          |                          |                          |                          |
|----|-----------------------------------------------------------|--------------------------|--------------------------|--------------------------|--------------------------|
| ၉  | ကျွန်ုပ်၏ ဘဝသည် ကျရှုံးမှုတစ်ခုသာ ဖြစ်သည်ဟု တွေးမိခဲ့သည်။ | <input type="checkbox"/> | <input type="checkbox"/> | <input type="checkbox"/> | <input type="checkbox"/> |
| ၁၀ | ကျွန်ုပ် စိုးရိမ်ကြောက်လန့်နေခဲ့သည်။                      | <input type="checkbox"/> | <input type="checkbox"/> | <input type="checkbox"/> | <input type="checkbox"/> |
| ၁၁ | ကောင်းမွန်နှစ်ခြိုက်စွာ အိပ်မရခဲ့ပါ။                      | <input type="checkbox"/> | <input type="checkbox"/> | <input type="checkbox"/> | <input type="checkbox"/> |
| ၁၂ | ကျွန်ုပ် ပျော်ရွှင်နေခဲ့သည်။                              | <input type="checkbox"/> | <input type="checkbox"/> | <input type="checkbox"/> | <input type="checkbox"/> |
| ၁၃ | ကျွန်ုပ် ပုံမှန်ထက် စကားပိုနည်းနေခဲ့သည်။                  | <input type="checkbox"/> | <input type="checkbox"/> | <input type="checkbox"/> | <input type="checkbox"/> |
| ၁၄ | အထီးကျန်ဆန်သည်ဟု ခံစားမိခဲ့သည်။                           | <input type="checkbox"/> | <input type="checkbox"/> | <input type="checkbox"/> | <input type="checkbox"/> |
| ၁၅ | လူများသည် ခင်မင်နှစ်လိုဖွယ် မကောင်းခဲ့ပါ။                 | <input type="checkbox"/> | <input type="checkbox"/> | <input type="checkbox"/> | <input type="checkbox"/> |
| ၁၆ | ဘဝတွင် နေပျော်ခဲ့သည်။                                     | <input type="checkbox"/> | <input type="checkbox"/> | <input type="checkbox"/> | <input type="checkbox"/> |
| ၁၇ | ငိုကြွေးပူဆွေးရသည့် အချိန်များရှိခဲ့သည်။                  | <input type="checkbox"/> | <input type="checkbox"/> | <input type="checkbox"/> | <input type="checkbox"/> |
| ၁၈ | ကျွန်ုပ် ဝမ်းနည်းနေခဲ့ရသည်။                               | <input type="checkbox"/> | <input type="checkbox"/> | <input type="checkbox"/> | <input type="checkbox"/> |
| ၁၉ | လူအများက ကျွန်ုပ်ကို မနှစ်သက်ကြ ဟုခံစားမိခဲ့သည်။          | <input type="checkbox"/> | <input type="checkbox"/> | <input type="checkbox"/> | <input type="checkbox"/> |
| ၂၀ | တစ်ခုခုကို စတင်လုပ်ကိုင်နိုင်စွမ်း မရှိခဲ့ပါ။             | <input type="checkbox"/> | <input type="checkbox"/> | <input type="checkbox"/> | <input type="checkbox"/> |
